# Supplementary material for: The intrinsically disordered SARS-CoV-2 nucleoprotein in dynamic complex with its viral partner nsp3a
Source: PubMed Central journal article supplement (PMC8769549; doi:10.1126/sciadv.abm4034), 2022-01-19
Supplement: sciadv.abm4034_sm.pdf [file sciadv.abm4034_sm.pdf]

Supplementary Materials for  
**The intrinsically disordered SARS-CoV-2 nucleoprotein in dynamic complex  
with its viral partner nsp3a**

Luiza Mamigonian Bessa, Serafima Guseva, Aldo R. Camacho-Zarco,  
Nicola Salvi, Damien Maurin, Laura Mariño Perez, Maiia Botova, Anas Malki, Max Nanao,  
Malene Ringkjøbing Jensen, Rob W. H. Ruigrok, Martin Blackledge\*

\*Corresponding author. Email: martin.blackledge@ibs.fr

Published 19 January 2022, *Sci. Adv.* **8**, eabm4034 (2022)

DOI: 10.1126/sciadv.abm4034

**This PDF file includes:**

Figs. S1 to S12

Tables S1 to S3

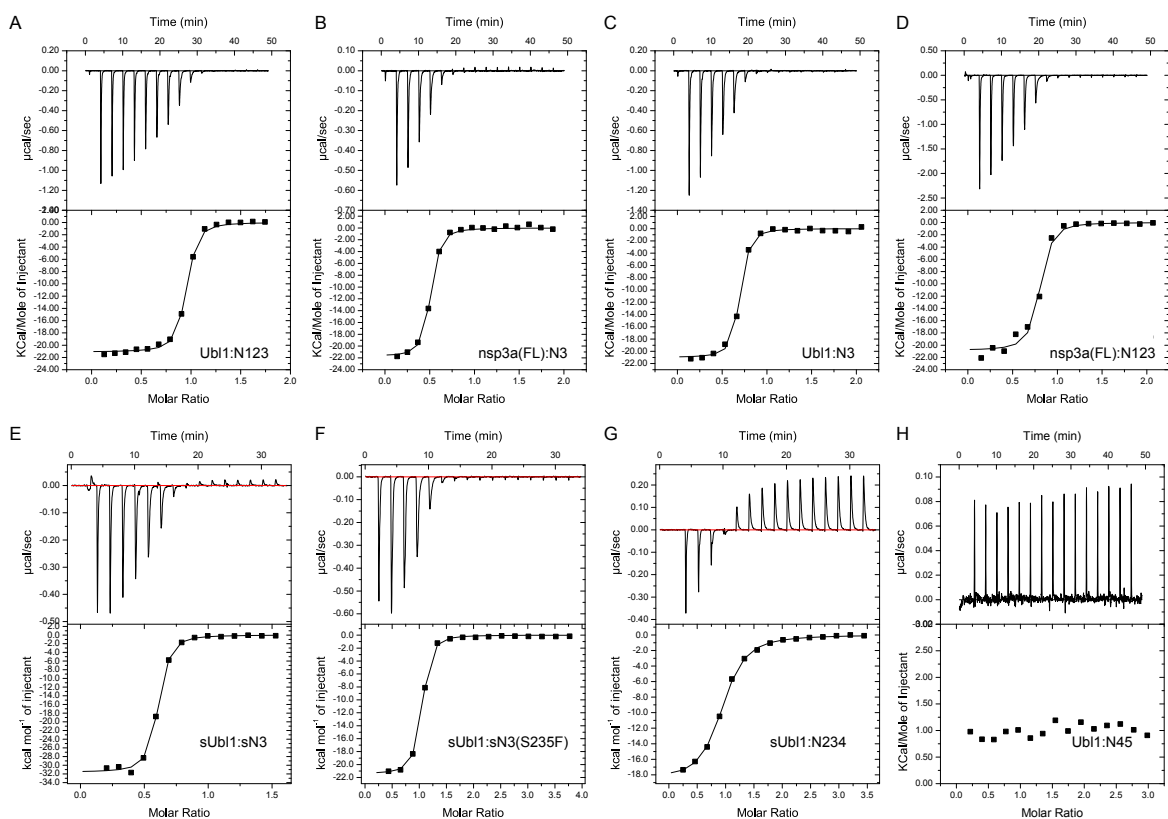

### Supporting figure S1

**Isothermal titration calorimetry (ITC) of different constructs of ns3pa and N.** All titrations were performed at 298K, adding aliquots of N (sN3, N3, N45, N234 and N123) to either Ub11 (1-111), sUb11 (16-111) or Nsp3a (1-206). All data were fitted to a two-state model. Parameters are listed below in table S1.

**Table S1. Thermodynamic parameters fitted to experimental ITC curves.**

|                  | $K_D$ (nM) | $\Delta H$ (kcal.mol <sup>-1</sup> ) | $\Delta S$ (cal.M <sup>-1</sup> deg <sup>-1</sup> ) | N           |
|------------------|------------|--------------------------------------|-----------------------------------------------------|-------------|
| N123:Nsp3a       | 131±25     | 21.6±4.0                             | -41                                                 | 0.665±0.007 |
| N3:Nsp3a         | 82±15      | 21.8±2.0                             | -41                                                 | 0.462±0.003 |
| N123:Ub11        | 72±12      | 21.1±1.0                             | -38                                                 | 0.903±0.003 |
| N3:Ub11          | 70±10      | 19.6±1.5                             | -33                                                 | 0.86±0.003  |
| N45:Nsp3a        | N/A        | N/A                                  | N/A                                                 | N/A         |
| sN3:sUb11        | 30±10      | 31.6±0.3                             | -71.5                                               | 0.567±0.003 |
| sN3(S235F):sUb11 | 57±8       | 21.4±0.3                             | -39                                                 | 0.95±0.003  |
| N234:sUb11       | 470±20     | 18.7±1.6                             | -34                                                 | 0.89±0.005  |

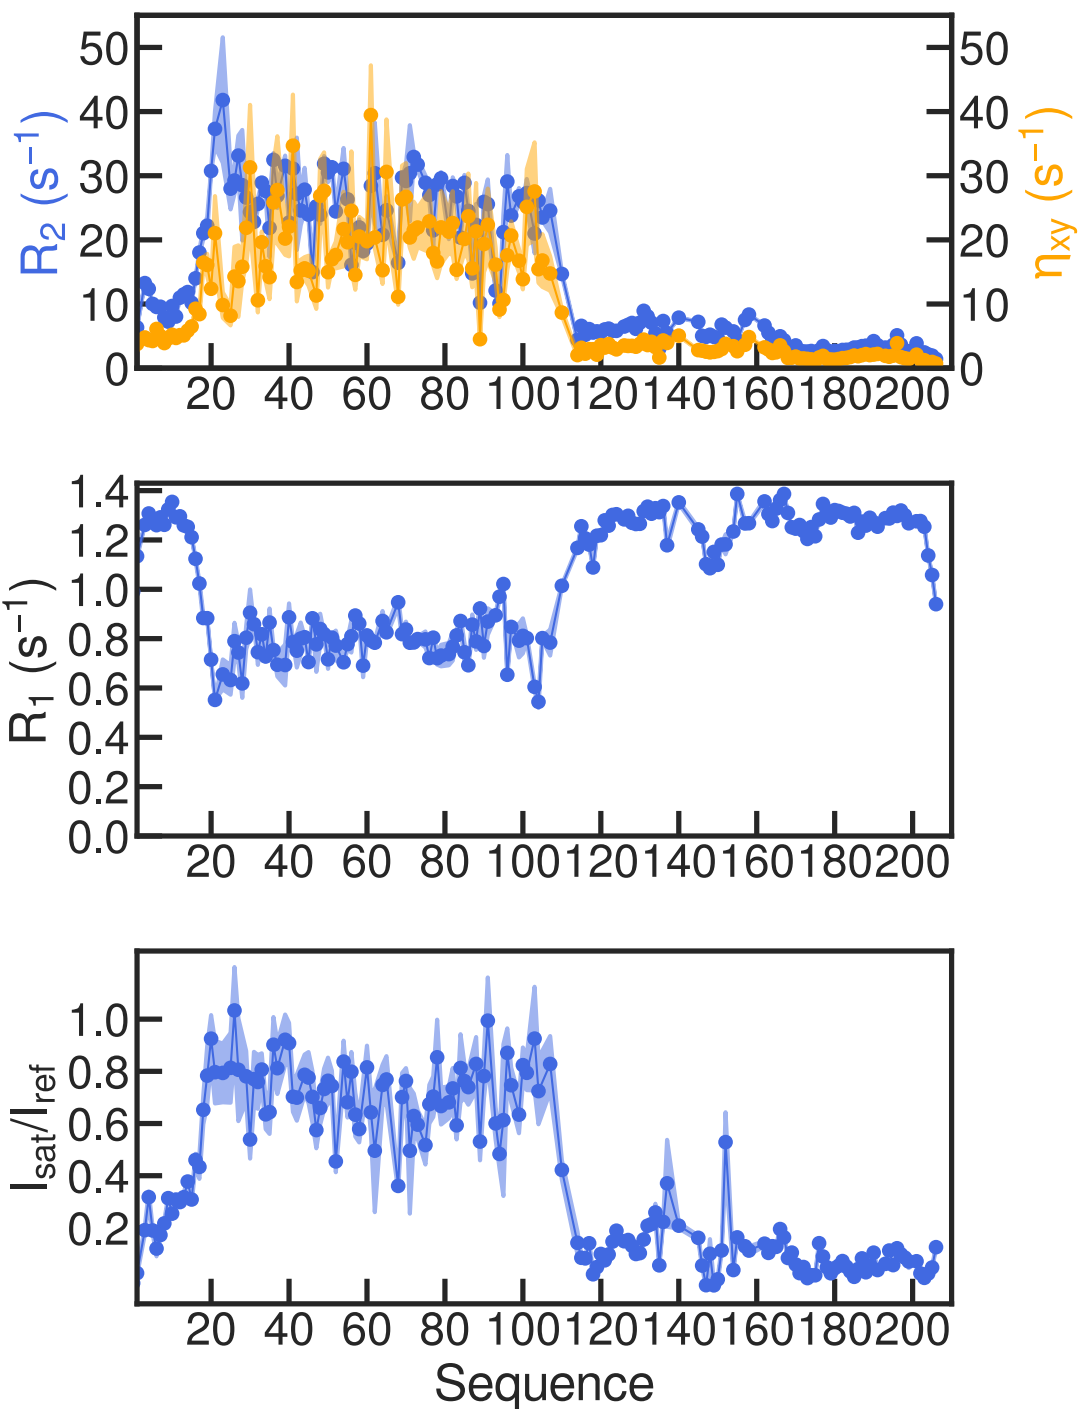

*Supporting figure S2*

**Dynamic behaviour of the isolated two-domain nsp3a protein.** <sup>15</sup>N NMR relaxation ( $R_{1\rho}$ ,  $R_1$ ,  $\eta_{xy}$  and heteronuclear nOe) were measured at 850MHz and 298K. Protein concentration was 800 $\mu$ M. Two flexible domains are immediately recognizable by their distinct relaxation properties.

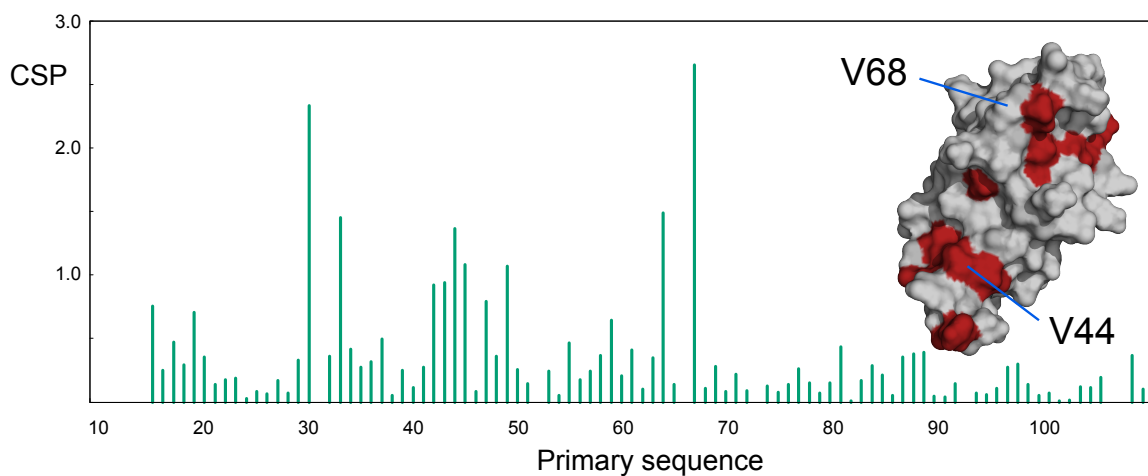

***Supporting figure S3***

**CSP of interaction surface on Ub11.** Combined  $^{15}\text{N}$ - $^1\text{H}$  chemical shift perturbations (CSPs) mapped along the primary sequence of sUb11 in complex with sN3 (derived from the spectrum shown in figure 2 in the main manuscript) measured on a 1:1 mixture at  $200\mu\text{M}$  concentration of protein in NMR buffer. Inset - Mapping of values greater than 0.5ppm onto the surface of the NMR structure sUb11 in complex with sN3 as determined in this manuscript.

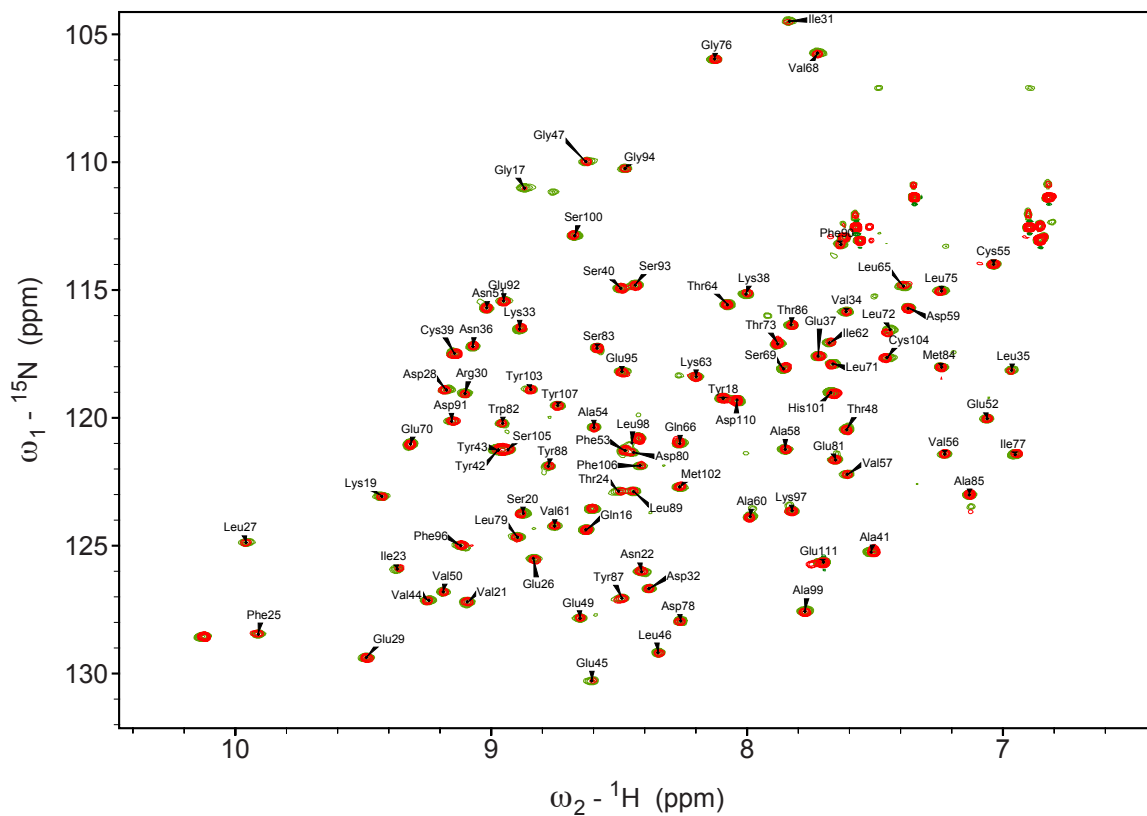

**Supporting figure S4**

**Comparison of S235F and original sN3 on interaction with sUbl1.**  $^{15}\text{N}$ - $^1\text{H}$  HSQC of sUbl1 in 1:1 complex with sN3 (spectrum shown in figure 2 in the main manuscript, green) compared to sUbl1 in 1:1 complex with the S235F mutant (alpha variant - shown in red). This comparison supports the conclusion derived from ITC (figure S1, table S1) showing that the complex is not significantly affected by this mutation. Spectra recorded at 298K, 850MHz and 200 $\mu\text{M}$ .

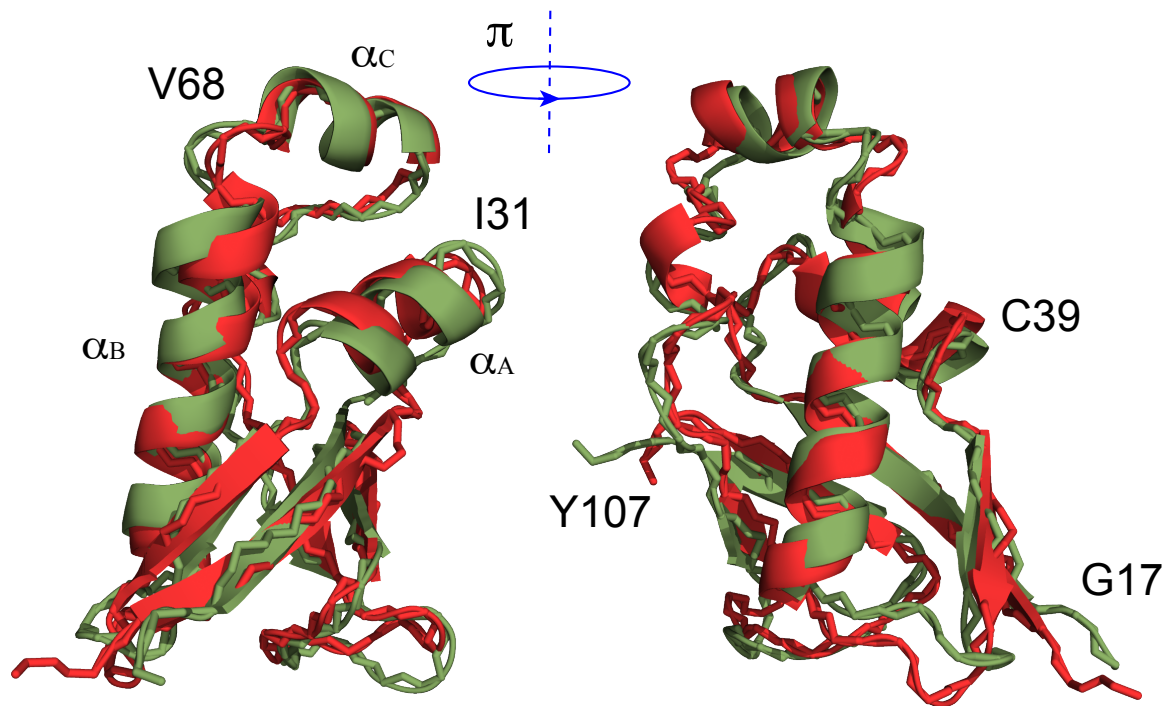

*Supporting figure S5*

**Comparison of bound and free forms of sUbl1.** X-ray crystallographic coordinates (red) were taken from the recently deposited structure from Stogios et al (pdb code 7kag). NMR structure of sUbl1 (green) in complex is the lowest restraint energy structure present in the NMR bundle determined here. Key differences are localized at Leu65 (at the C-terminus of helix  $\alpha_B$ ), Cys39 (C-terminus of helix  $\alpha_A$ ) in the main  $\alpha_1$  N3 binding site.

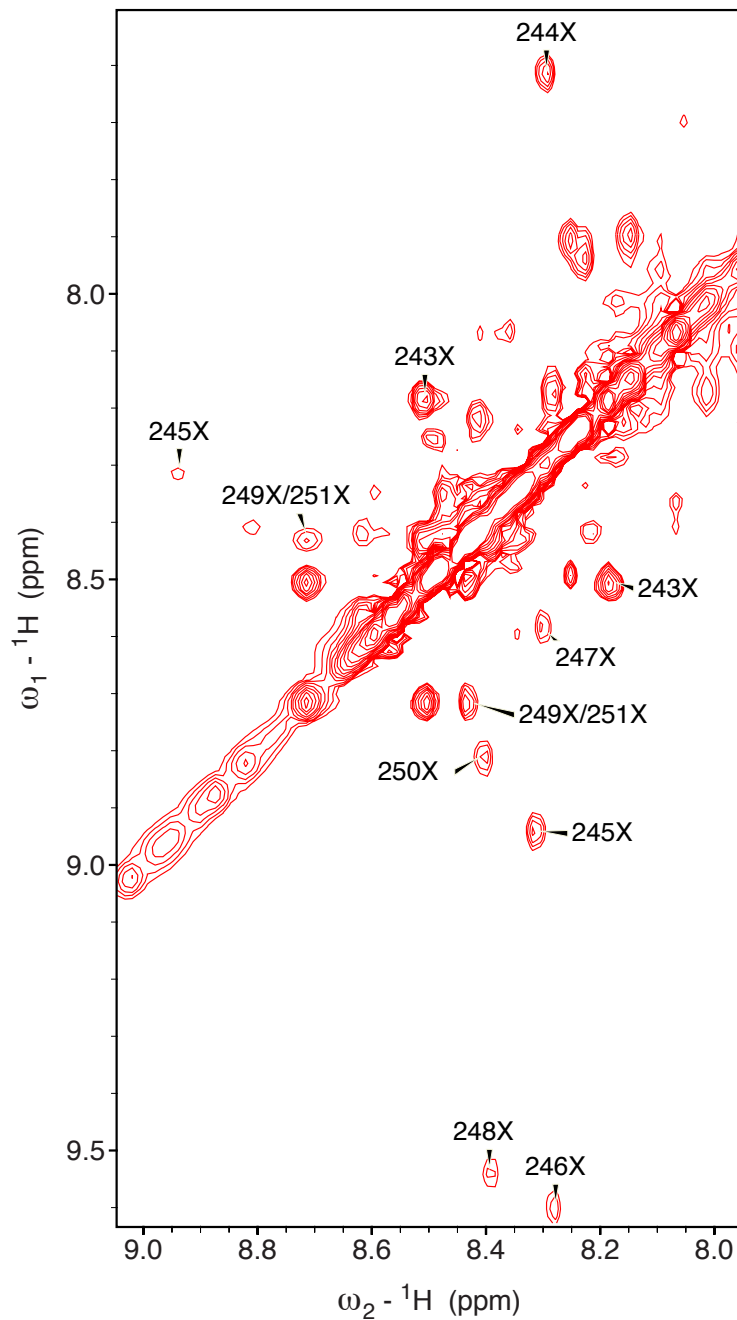

***Supporting figure S6***

**EXSY exchange cross peaks in  $\beta\alpha_2$  binding site.** Exchange cross-peaks identified in the  $^1\text{H}$ - $^1\text{H}$  NOESY (EXSY) measured on a 1:1 complex of sUb11 and sN3 at 600MHz and 298K. Mixing times were measured between 10 and 700ms (75ms is shown in the figure). A continuous stretch of 9 amino acids, from G243 to A251 exhibit exchange cross peaks reporting on binding and unbinding of the  $\beta\alpha_2$  site.

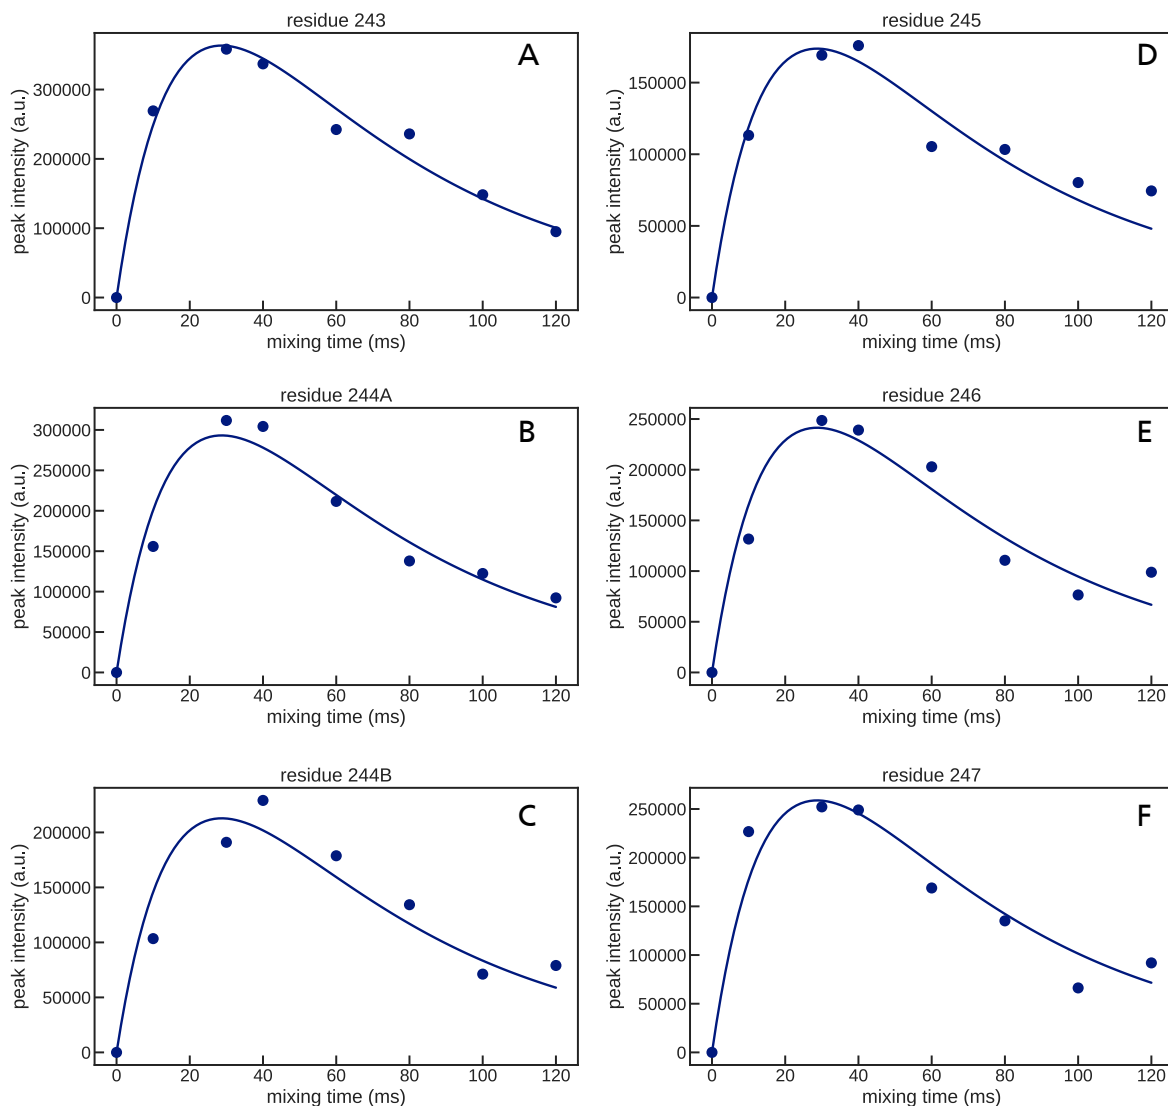

### Supporting figure S7

#### Characterisation of exchange between free and bound forms of the $\beta\alpha_2$ site.

A-F - Examples of the 9 build-up curves fitted to evolution of EXSY cross-peak intensities using expressions describing the evolution of longitudinal exchange phenomena. Experiments were performed on a 1:1 mixture of sUb11:sN3 at a concentration of 300 $\mu$ M at 600MHz. The data were fitted simultaneously as described in the Methods, resulting in an estimated common apparent exchange rate of  $42 \pm 13 \text{ s}^{-1}$  (and a  $^1\text{H } R_1 = 18 \pm 3 \text{ s}^{-1}$ ).

G - Apparent  $k_{\text{ex}}$  ( $k_{\text{ex,app}}$ ) as a function of  $k_{\text{ab}}$ , using equation 9.8.2 in reference (69), assuming  $R_{1A}=R_{1B}$  and a true  $k_{\text{ex}} = 42 \text{ s}^{-1}$ . This shows that  $k_{\text{ex,app}}$  is always smaller than the true value, and  $k_{\text{ex}} = k_{\text{ex,app}}$  if  $p_a=p_b$ .

H - Dependence of  $k_{\text{ex,app}}$  on  $k_{\text{ab}}$  for different values of  $p_a$ . Assuming a population of the complex  $> 0.9$ ,  $k_{\text{ex,app}} = 42 \text{ s}^{-1}$  implies that  $k_{\text{ab}} > 2 \text{ s}^{-1}$  (value extracted assuming  $p_a=0.99$ ) and  $< 7 \text{ s}^{-1}$  (value extracted if  $p_a=0.9$ ). From this, we can conclude that  $63 < k_{\text{ba}} < 198 \text{ s}^{-1}$  and  $70 < k_{\text{ex}} < 200 \text{ s}^{-1}$ .



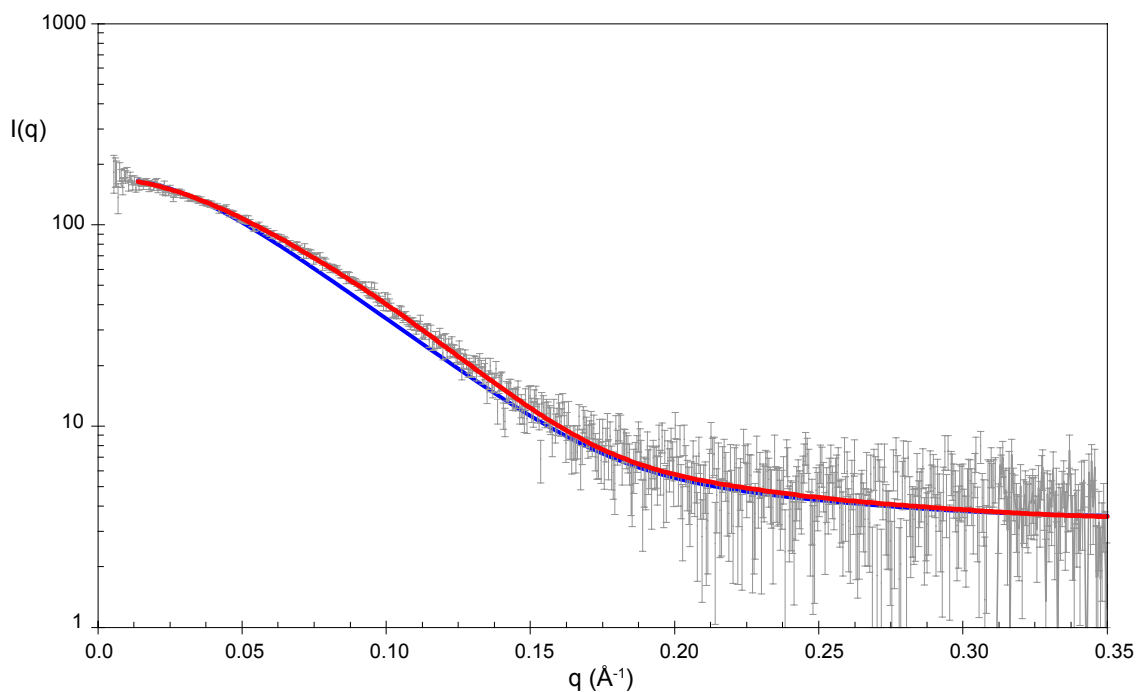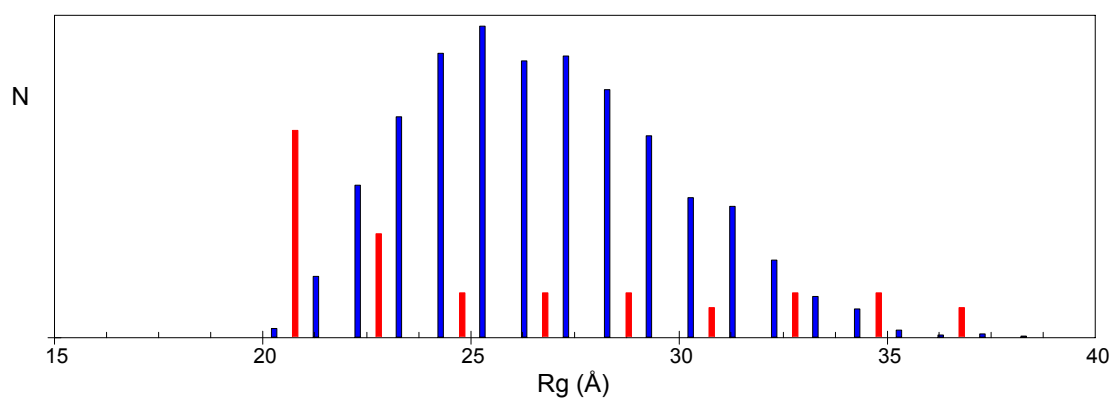

**Supporting figure S8**

**Small angle X-ray scattering reveals a compact sUbl1:sN3 complex.**

Top – Experimental (grey) and simulated (red) SAXS data from the Ubl1:N3 1:1 complex at a concentration of 300 $\mu$ M and temperature of 298K. Simulated data resulted from ensembles of conformations selected from a pool of 10000 structures of the Ubl1:N3 complex (see Methods). The red line represents an ensemble of 7 structures (no difference in averages radius of gyration was observed when ensembles of 5-10 conformers were used), selected using the algorithm ASTEROIDS (74). The blue line shows the average over the full ensemble. Measurements were acquired at the European Synchrotron Research Facility (ESRF) in Grenoble France on beamline BM29.

Bottom – Distribution of radii of gyration for the full ensemble of 10000 structures (blue) and 5 ensembles of 7 structures (red) selected using ASTEROIDS, showing that more compact structures are required to reproduce the experimental data.

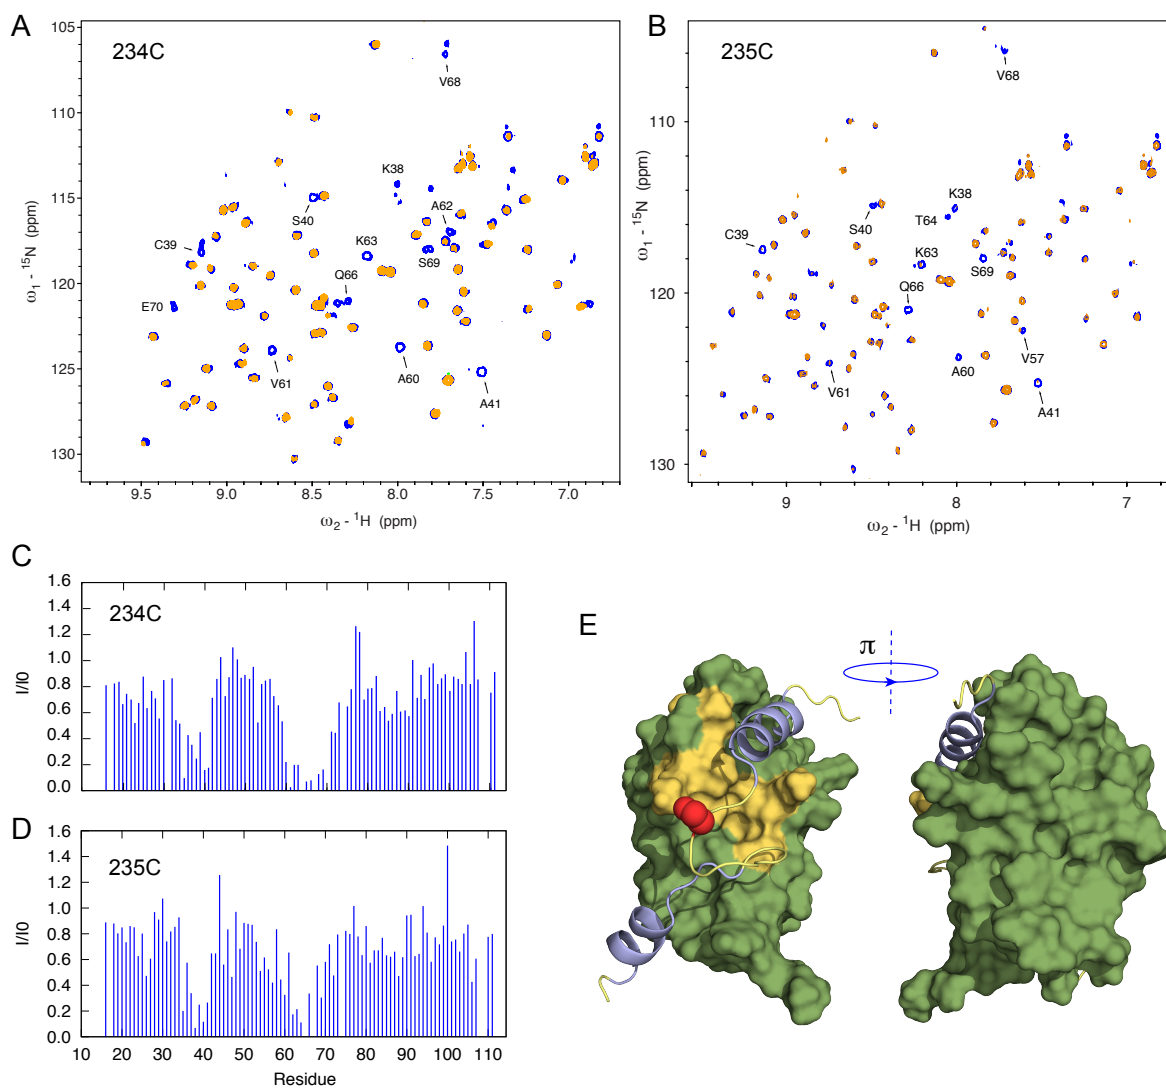

### Supporting figure S9

**Paramagnetic relaxation enhancement validates the NOESY derived structure.** A –  $^{15}\text{N}$ - $^1\text{H}$  HSQC of sUb11 in 1:1 complex (3400 $\mu\text{M}$ ) with M234C mutant of sN3. Spectra recorded at 850MHz in the presence of oxidised and reduced forms of TEMPO-maleimide present on cysteine 234. B –  $^{15}\text{N}$ - $^1\text{H}$  HSQC of sUb11 in 1:1 complex with S235C mutant of sN3. Spectra recorded at 850MHz in presence of oxidised and reduced forms of TEMPO-maleimide present on cysteine 235. C, D - Paramagnetic relaxation enhancements (PREs), derived from intensity ratios comparing spectra in A and in B respectively. E – representation of regions showing broadening on Ub11 in the presence of spin labelled C235. Orange surface represents region with PREs lower than 0.5. Position of C235 in the flexible loop is shown in red.

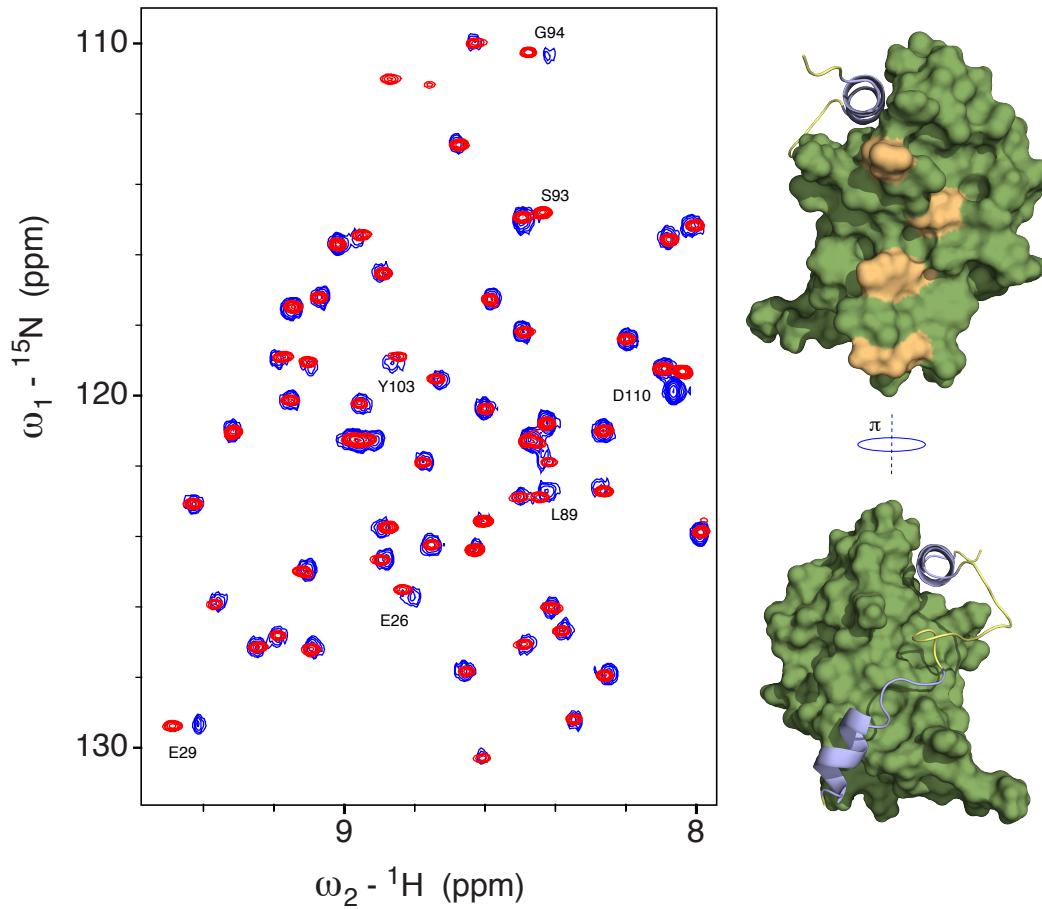

***Supporting figure S10***

**Evidence for transient contacts between sN3 (191-213) and Ubl1.** Excerpt from the  $^{15}\text{N}$ - $^1\text{H}$  HSQC of sUbl1 in 1:1 complex with sN3 (spectrum shown in red) compared to sUbl1 in 1:1 complex with a truncated form of sN3 (215-263, shown in blue). The small CSPs induced in the sUbl1 spectrum are all located on the opposing surface of Ubl1 to the main interaction site, as expected if transient weak interactions of the N-terminal region of sN3 (191-213) were no longer present, again validating the sense of the  $\alpha_1$  binding site. Spectra recorded at 298K, 850MHz and 300 $\mu\text{M}$ .

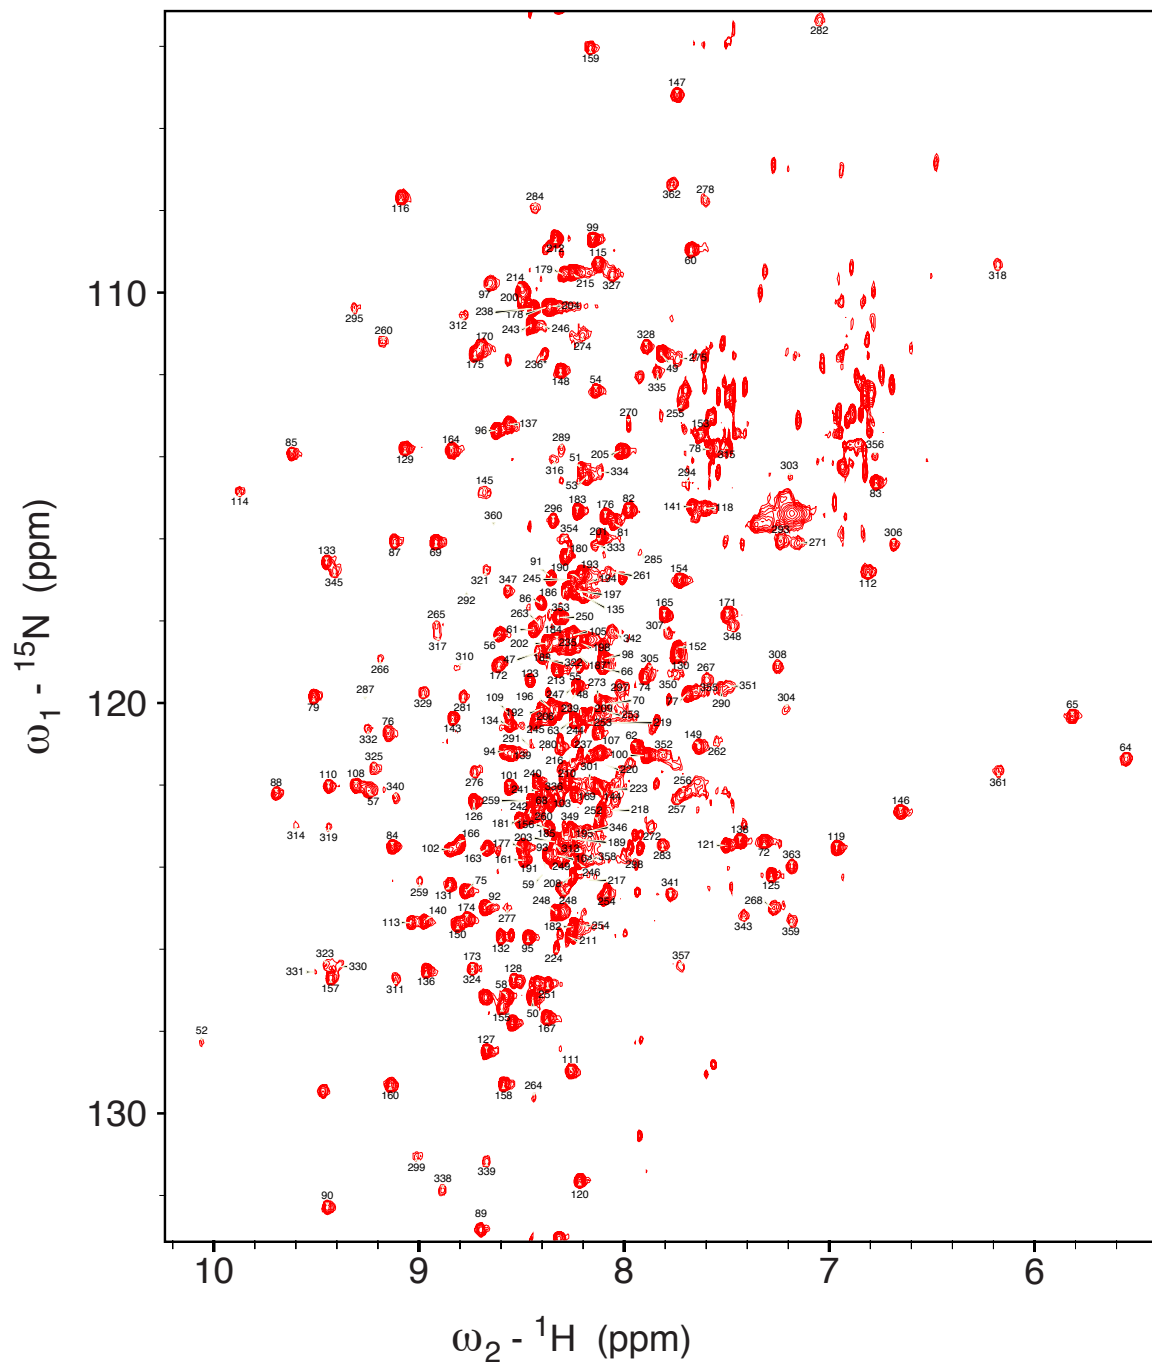

**Supporting figure S11**

Assigned  $^{15}\text{N}$ - $^1\text{H}$  HSQC of N234 (850MHz, 298K, 380 $\mu\text{M}$ ). Assignments from regions corresponding to N2 and N4 were taken directly from recent publications (25, 55), assignment of N3 was taken from our recent publication (44). Negligible CSPs were observed between published assignments for the isolated domains and the three domains in tandem, demonstrating structural independence of N2 and N4 in the isolated form of the protein.

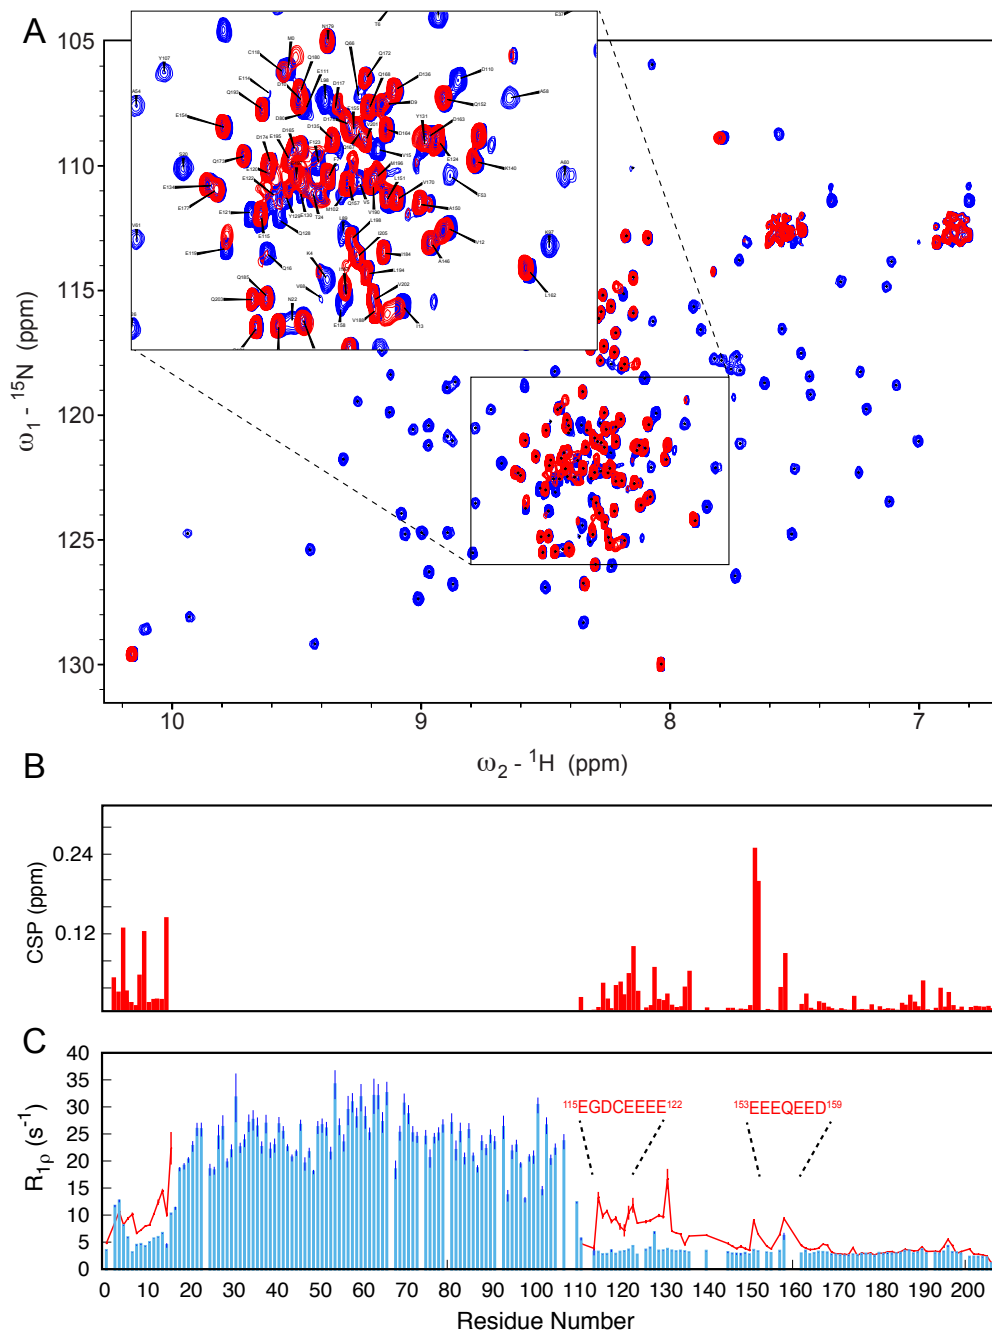

**Supporting figure S12**

**Transient interactions between disordered tail of nsp3a and N234:Ub11.** The disordered domain of nsp3a interacts transiently with N234 in complex with Ub11 via basic strands distributed along the chain. A -  ${}^{15}\text{N}$  relaxation ( $R_{1\rho}$ ) measured at 298K, 850MHz and 200 $\mu\text{M}$  of free (blue)  ${}^2\text{D}$  labelled nsp3a, and  ${}^2\text{D}$  labelled nsp3a in 1:1 complex with Ub11. B, C – CSPs and assigned  ${}^{15}\text{N}$ - ${}^1\text{H}$  HSQC of the two samples (850MHz, 298K, 200 $\mu\text{M}$ ), showing chemical shifts located in the N-terminal region and in the negatively charged 110-130 region of nsp3a.

**Table S2****NMR structure determination statistics**

|                                                                          |                    |
|--------------------------------------------------------------------------|--------------------|
| Distance constraints                                                     |                    |
| Total NOE                                                                | 597                |
| Intermolecular                                                           | 54                 |
| Intramolecular                                                           | 543                |
| Intraresidue                                                             | 71                 |
| Sequential                                                               | 126                |
| Medium range ( $i=j\pm 2,3,4$ )                                          | 87                 |
| Long range ( $ i-j >4$ )                                                 | 240                |
| Ambiguous                                                                | 64                 |
| Hydrogen bonds                                                           | 39                 |
| Dihedral angle restraints                                                |                    |
| Phi                                                                      | 66                 |
| Psi                                                                      | 66                 |
| Structural statistics <sup>a</sup>                                       |                    |
| Violations (mean $\pm$ s.d.)                                             |                    |
| Distance constraints ( $>0.2\text{\AA}$ )                                | 0.03 $\pm$ 0.03    |
| Dihedral angle constraints                                               | 0.0 $\pm$ 0.0      |
| Maximum distance violation                                               | 0.16               |
| Maximum dihedral angle violation                                         | 2.02               |
| Deviations from idealized geometry                                       |                    |
| Bonds ( $\text{\AA}$ )                                                   | 0.006 $\pm$ 0.0001 |
| Angles ( $^\circ$ )                                                      | 0.62 $\pm$ 0.02    |
| Improper dihedrals ( $^\circ$ )                                          | 0.44 $\pm$ 0.02    |
| Percentage residues in favoured and allowed regions of Ramachandran plot | 97.1               |
| Average pairwise rms deviation ( $\text{\AA}$ )                          |                    |
| Heavy (Ub11)                                                             | 2.36 $\pm$ 0.30    |
| Backbone (Ub11)                                                          | 1.41 $\pm$ 0.26    |
| Heavy (sN3)                                                              | 2.65 $\pm$ 0.54    |
| Backbone (sN3)                                                           | 1.80 $\pm$ 0.42    |
| Heavy (sN3:Ub11)                                                         | 2.50 $\pm$ 0.30    |
| Backbone (sN3:Ub11)                                                      | 1.60 $\pm$ 0.26    |
| Backbone wrt medoid (sN3:Ub11)                                           | 0.70 $\pm$ 0.12    |

a – The structured part of the complex is taken into consideration: Ub11 (16-110) and N3 (218-231, 244-257).

**Table S3**  
**SAS data acquisition, sample details, data analysis, modelling fitting and software used.**

|                                                                         |                                                                                                                                                |                                                                                                                                              |                                                                                                                                                |
|-------------------------------------------------------------------------|------------------------------------------------------------------------------------------------------------------------------------------------|----------------------------------------------------------------------------------------------------------------------------------------------|------------------------------------------------------------------------------------------------------------------------------------------------|
| Sample                                                                  | N3:Ubl1                                                                                                                                        | N234:Ubl1                                                                                                                                    | N234                                                                                                                                           |
| Organism                                                                | SARS Cov 2                                                                                                                                     | SARS Cov 2                                                                                                                                   | SARS Cov 2                                                                                                                                     |
| Source                                                                  | <i>E. coli</i><br>BL21(DE3)/BL21(A1)                                                                                                           | <i>E. coli</i><br>BL21(DE3)/BL21(A1)                                                                                                         | <i>E. coli</i><br>BL21(DE3)/BL21(A1)                                                                                                           |
| Sequence                                                                | NC 045512.2                                                                                                                                    | NC 045512.2                                                                                                                                  | NC 045512.2                                                                                                                                    |
| Ext Coeff (e) M <sup>-1</sup> cm <sup>-1</sup>                          | 14565                                                                                                                                          | 43890                                                                                                                                        | 43890                                                                                                                                          |
| Mass (Da)                                                               | 21674.17                                                                                                                                       | 43836.77                                                                                                                                     | 34622.61                                                                                                                                       |
| Concentration                                                           | 0.5, 1.0, 2.0 mg/ml                                                                                                                            | 0.5, 1.0 mg/ml                                                                                                                               | 0.5, 1.0 mg/ml                                                                                                                                 |
| Solvent                                                                 | 50 mM Na-Phosphate<br>pH 6.5, 250 mM NaCl<br>2mM DTT buffer                                                                                    | 50 mM Na-Phosphate<br>pH 6.5, 250 mM NaCl<br>2mM DTT buffer                                                                                  | 50 mM Na-Phosphate<br>pH 6.5, 250 mM NaCl<br>2mM DTT buffer                                                                                    |
| Source, beamline                                                        | ESR BM29 BioSAXS                                                                                                                               | ESR BM29 BioSAXS                                                                                                                             | ESR BM29 BioSAXS                                                                                                                               |
| Wavelength                                                              | 0.99Å                                                                                                                                          | 0.99Å                                                                                                                                        | 0.99Å                                                                                                                                          |
| Detector model                                                          | Pilatus 2M                                                                                                                                     | Pilatus 2M                                                                                                                                   | Pilatus 2M                                                                                                                                     |
| Detector type                                                           | CMOS hybrid pixel                                                                                                                              | CMOS hybrid pixel                                                                                                                            | CMOS hybrid pixel                                                                                                                              |
| Beam geometry (size, sample-to-detector distance)                       | 0.7 mm x 0.7 mm,<br>2.867 m                                                                                                                    | 0.7 mm x 0.7 mm,<br>2.867 m                                                                                                                  | 0.7 mm x 0.7 mm,<br>2.867 m                                                                                                                    |
| <i>q</i> -measurement range (Å <sup>-1</sup> )                          | 0.0039 – 0.49                                                                                                                                  | 0.0039 – 0.49                                                                                                                                | 0.0039 – 0.49                                                                                                                                  |
| Energy range (keV)                                                      | 12.5                                                                                                                                           | 12.5                                                                                                                                         | 12.5                                                                                                                                           |
| Absolute scaling method                                                 | Comparison with<br>buffer scattering                                                                                                           | Comparison with<br>buffer scattering                                                                                                         | Comparison with<br>buffer scattering                                                                                                           |
| Basis for normalization to<br>constant counts                           | Transmitted beam<br>intensity measured by<br>integrated beamstop<br>diode (70)                                                                 | Transmitted beam<br>intensity measured by<br>integrated beamstop<br>diode (70)                                                               | Transmitted beam<br>intensity measured by<br>integrated beamstop<br>diode (70)                                                                 |
| Method for monitoring<br>radiation damage, X-ray dose<br>where relevant | Inspection of each<br>frame                                                                                                                    | Inspection of each<br>frame                                                                                                                  | Inspection of each<br>frame                                                                                                                    |
| Exposure time, number of<br>exposures                                   | 1s/frame, 10 frames                                                                                                                            | 1s/frame, 10 frames                                                                                                                          | 1s/frame, 10 frames                                                                                                                            |
| Sample temperature                                                      | 298K                                                                                                                                           | 298K                                                                                                                                         | 298K                                                                                                                                           |
| SAS data reduction to sample-<br>solvent scattering                     | Solvent subtraction,<br>averaging using BM29<br>online processing                                                                              | Solvent subtraction,<br>averaging using BM29<br>online processing                                                                            | Solvent subtraction,<br>averaging using BM29<br>online processing                                                                              |
| Analytical method                                                       | Comparison of SAXS<br>curves predicted from<br>an ensemble of<br>conformations of<br>N3:Ubl1 complex plus<br>statistical coil sampling<br>(72) | Comparison of SAXS<br>curves predicted from<br>individual<br>conformations of<br>N234/Ubl1 complex<br>plus statistical coil<br>sampling (72) | Comparison of SAXS<br>curves predicted from<br>an ensemble of<br>conformations of<br>N234 generated using<br>statistical coil<br>sampling (72) |
| SAXS curve prediction<br>software                                       | Crysol (73)                                                                                                                                    | Crysol3 (73)                                                                                                                                 | Crysol (73)                                                                                                                                    |
| Fitting software                                                        | ASTEROIDS (74)<br>ensemble selection                                                                                                           | Crysol3 (73)<br>Default settings                                                                                                             | No fitting                                                                                                                                     |
| $\chi^2$                                                                | 1.08                                                                                                                                           | 1.36                                                                                                                                         | N/A                                                                                                                                            |
| Predicted R <sub>g</sub> (Å)                                            | 24.9                                                                                                                                           | 37.1                                                                                                                                         | N/A                                                                                                                                            |
| Vol (Å <sup>3</sup> ), Ra (Å), Dro (eÅ <sup>-3</sup> )                  | N/A                                                                                                                                            | 122041                                                                                                                                       | N/A                                                                                                                                            |
| Guinier analysis range (Å <sup>-1</sup> )                               | 0.01-0.03                                                                                                                                      | 0.01-0.03                                                                                                                                    | N/A                                                                                                                                            |
| Simulation/data comparison<br>range (Å <sup>-1</sup> )                  | 0.01-0.35                                                                                                                                      | 0.01-0.35                                                                                                                                    | 0.01-0.35                                                                                                                                      |
